# Supplementary material
Source: PubMed Central journal article supplement (PMC9476336)
Supplement: 12891_2022_5806_MOESM1_ESM.pdf [file 12891_2022_5806_MOESM1_ESM.pdf]

Appendix:

Content:

|                                                                                           |           |
|-------------------------------------------------------------------------------------------|-----------|
| <b>Appendix 1: Pain Disability .....</b>                                                  | <b>2</b>  |
| <i>Appendix 1.1 - Adjusted Modell - Pain Disability.....</i>                              | <i>2</i>  |
| <i>Appendix 1.2 - Adjusted Modell - Pain Disability - Sex = Female.....</i>               | <i>3</i>  |
| <i>Appendix 1.3 - Adjusted Modell - Pain Disability - Sex = Male .....</i>                | <i>2</i>  |
| <b>Appendix 2: Pain Intensity.....</b>                                                    | <b>3</b>  |
| <i>Appendix 2.1 - Adjusted Modell - Pain Intensity.....</i>                               | <i>3</i>  |
| <i>Appendix 2.2 - Adjusted Modell - Pain Intensity - Sex = Female.....</i>                | <i>4</i>  |
| <i>Appendix 2.3 - Adjusted Modell - Pain Intensity - Sex = Male .....</i>                 | <i>5</i>  |
| <b>Appendix 3: Subgroup analyses .....</b>                                                | <b>6</b>  |
| <i>Appendix 3.1 - Adjusted Modell - Pain Disability – Pre Covid .....</i>                 | <i>6</i>  |
| <i>Appendix 3.2 - Adjusted Modell - Pain Disability – During Covid .....</i>              | <i>7</i>  |
| <i>Appendix 3.3 - Adjusted Modell - Pain Intensity – Pre Covid .....</i>                  | <i>8</i>  |
| <i>Appendix 3.4 - Adjusted Modell - Pain Intensity – During Covid .....</i>               | <i>9</i>  |
| <b>Appendix 4: Sensitivity analyses .....</b>                                             | <b>10</b> |
| <i>Appendix 4.1 - Adjusted Modell - Pain Disability – Pre Covid - Sensitivity.....</i>    | <i>10</i> |
| <i>Appendix 4.2 - Adjusted Modell - Pain Disability – During Covid Sensitivity .....</i>  | <i>11</i> |
| <i>Appendix 4.3 - Adjusted Modell - Pain Intensity – Pre Covid - Sensitivity.....</i>     | <i>12</i> |
| <i>Appendix 4.4 - Adjusted Modell - Pain Intensity – During Covid - Sensitivity .....</i> | <i>13</i> |

## Appendix 1: Pain Disability

### Appendix 1.1 - Adjusted Modell - Pain Disability

| <i>Appendix 1.1 - Adjusted Modell - Pain Disability</i> |                             |                     |         |                         |                     |         |
|---------------------------------------------------------|-----------------------------|---------------------|---------|-------------------------|---------------------|---------|
| Characteristic                                          | 02 moderate pain disability |                     |         | 03 high pain disability |                     |         |
|                                                         | OR <sup>1</sup>             | 95% CI <sup>1</sup> | p-value | OR <sup>1</sup>         | 95% CI <sup>1</sup> | p-value |
| Overall health                                          |                             |                     |         |                         |                     |         |
| 01_Very good                                            | —                           | —                   |         | —                       | —                   |         |
| 02_good                                                 | 1.82                        | 1.43, 2.31          | <0.001  | 2.06                    | 1.49, 2.83          | <0.001  |
| 03_bad                                                  | 4.97                        | 3.62, 6.82          | <0.001  | 10.0                    | 6.89, 14.6          | <0.001  |
| PHQ-4                                                   | 1.23                        | 1.17, 1.29          | <0.001  | 1.50                    | 1.43, 1.59          | <0.001  |
| Activity days per week                                  |                             |                     |         |                         |                     |         |
| 00_never                                                | —                           | —                   |         | —                       | —                   |         |
| 01_1day_per_wk                                          | 0.68                        | 0.45, 1.01          | 0.057   | 0.62                    | 0.40, 0.97          | 0.035   |
| 02_2days_per_wk                                         | 0.71                        | 0.47, 1.06          | 0.090   | 0.72                    | 0.46, 1.13          | 0.15    |
| 03_3days_per_wk                                         | 0.83                        | 0.55, 1.26          | 0.39    | 0.84                    | 0.52, 1.34          | 0.46    |
| 04_four or more                                         | 0.72                        | 0.47, 1.11          | 0.14    | 1.03                    | 0.64, 1.66          | 0.90    |
| Sport days per week                                     |                             |                     |         |                         |                     |         |
| 01_no sports                                            | —                           | —                   |         | —                       | —                   |         |
| 02_less than two h per week                             | 0.90                        | 0.66, 1.23          | 0.51    | 0.78                    | 0.57, 1.09          | 0.14    |
| 03_two to 4h per week                                   | 0.90                        | 0.65, 1.23          | 0.50    | 0.61                    | 0.44, 0.86          | 0.005   |
| 04_more than four h per week                            | 0.56                        | 0.39, 0.80          | 0.002   | 0.42                    | 0.28, 0.63          | <0.001  |
| Duration physical activity                              |                             |                     |         |                         |                     |         |
| 01_less than ten minutes                                | —                           | —                   |         | —                       | —                   |         |
| 02_10 to 30 minutes                                     | 0.94                        | 0.60, 1.46          | 0.78    | 1.05                    | 0.65, 1.69          | 0.85    |
| 03_30 to 60 minutes                                     | 1.05                        | 0.68, 1.62          | 0.82    | 1.03                    | 0.64, 1.65          | 0.90    |
| 04_more than 60 minutes                                 | 1.19                        | 0.76, 1.85          | 0.45    | 1.06                    | 0.65, 1.73          | 0.81    |
| Sex                                                     |                             |                     |         |                         |                     |         |
| M                                                       | —                           | —                   |         | —                       | —                   |         |
| W                                                       | 0.91                        | 0.75, 1.10          | 0.32    | 0.87                    | 0.70, 1.08          | 0.20    |
| Age                                                     | 1.00                        | 0.99, 1.01          | 0.49    | 1.02                    | 1.01, 1.03          | 0.004   |
| Number of M-Diagnoses                                   | 1.07                        | 1.04, 1.09          | <0.001  | 1.17                    | 1.14, 1.19          | <0.001  |
| Number of F-Diagnoses                                   | 0.99                        | 0.97, 1.01          | 0.34    | 0.99                    | 0.96, 1.01          | 0.29    |
| Sitting time                                            |                             |                     |         |                         |                     |         |
| 01_less than half of the day                            | —                           | —                   |         | —                       | —                   |         |
| 02_half of the day                                      | 1.02                        | 0.79, 1.31          | 0.90    | 0.82                    | 0.62, 1.09          | 0.18    |
| 03_at least 3/4 of the day                              | 1.05                        | 0.82, 1.36          | 0.70    | 0.70                    | 0.53, 0.93          | 0.015   |
| 04_almost all day                                       | 0.96                        | 0.71, 1.29          | 0.79    | 0.80                    | 0.58, 1.12          | 0.20    |
| Job Status                                              |                             |                     |         |                         |                     |         |
| 01_unemployed                                           | —                           | —                   |         | —                       | —                   |         |
| 02_self employed                                        | 1.12                        | 0.75, 1.67          | 0.59    | 1.06                    | 0.68, 1.66          | 0.80    |
| 03_regularly employed                                   | 1.11                        | 0.76, 1.61          | 0.59    | 0.92                    | 0.60, 1.39          | 0.68    |
| wscore                                                  | 0.96                        | 0.90, 1.03          | 0.30    | 0.97                    | 0.90, 1.05          | 0.50    |

<sup>1</sup>OR = Odds Ratio, CI = Confidence Interval

## Appendix 1.2 - Adjusted Modell - Pain Disability - Sex = Female

| Appendix 1.2 - Adjusted Modell - Pain Disability - Sex = Female |                             |                     |                  |                         |                     |                  |
|-----------------------------------------------------------------|-----------------------------|---------------------|------------------|-------------------------|---------------------|------------------|
| Characteristic                                                  | 02 moderate pain disability |                     |                  | 03 high pain disability |                     |                  |
|                                                                 | OR <sup>1</sup>             | 95% CI <sup>1</sup> | p-value          | OR <sup>1</sup>         | 95% CI <sup>1</sup> | p-value          |
| Overall health                                                  |                             |                     |                  |                         |                     |                  |
| 01_Very good                                                    | —                           | —                   |                  | —                       | —                   |                  |
| 02_good                                                         | 1.57                        | 1.04, 2.36          | <b>0.031</b>     | 2.08                    | 1.18, 3.67          | <b>0.012</b>     |
| 03_bad                                                          | 4.46                        | 2.66, 7.50          | <b>&lt;0.001</b> | 10.4                    | 5.49, 19.6          | <b>&lt;0.001</b> |
| PHQ-4                                                           | 1.18                        | 1.09, 1.28          | <b>&lt;0.001</b> | 1.44                    | 1.32, 1.56          | <b>&lt;0.001</b> |
| Activity days per week                                          |                             |                     |                  |                         |                     |                  |
| 00_never                                                        | —                           | —                   |                  | —                       | —                   |                  |
| 01_1day_per_wk                                                  | 0.71                        | 0.34, 1.49          | 0.37             | 0.69                    | 0.30, 1.59          | 0.38             |
| 02_2days_per_wk                                                 | 0.44                        | 0.21, 0.94          | <b>0.035</b>     | 0.69                    | 0.29, 1.63          | 0.40             |
| 03_3days_per_wk                                                 | 0.56                        | 0.26, 1.23          | 0.15             | 0.79                    | 0.32, 1.93          | 0.61             |
| 04_four or more                                                 | 0.47                        | 0.21, 1.05          | <b>0.067</b>     | 1.17                    | 0.48, 2.84          | 0.74             |
| Sport days per week                                             |                             |                     |                  |                         |                     |                  |
| 01_no sports                                                    | —                           | —                   |                  | —                       | —                   |                  |
| 02_less than two h per week                                     | 1.09                        | 0.63, 1.91          | 0.75             | 0.81                    | 0.45, 1.47          | 0.49             |
| 03_two to 4h per week                                           | 0.97                        | 0.55, 1.74          | 0.93             | 0.47                    | 0.25, 0.88          | <b>0.018</b>     |
| 04_more than four h per week                                    | 0.59                        | 0.30, 1.16          | 0.13             | 0.30                    | 0.14, 0.63          | <b>0.002</b>     |
| Duration physical activity                                      |                             |                     |                  |                         |                     |                  |
| 01_less than ten minutes                                        | —                           | —                   |                  | —                       | —                   |                  |
| 02_10 to 30 minutes                                             | 0.66                        | 0.30, 1.44          | 0.29             | 0.76                    | 0.32, 1.83          | 0.54             |
| 03_30 to 60 minutes                                             | 1.00                        | 0.47, 2.12          | >0.99            | 1.04                    | 0.44, 2.44          | 0.93             |
| 04_more than 60 minutes                                         | 1.28                        | 0.59, 2.78          | 0.54             | 1.09                    | 0.45, 2.63          | 0.85             |
| Age                                                             | 1.01                        | 0.99, 1.02          | 0.46             | 1.02                    | 1.01, 1.04          | <b>0.009</b>     |
| Number of M-Diagnoses                                           | 1.09                        | 1.04, 1.14          | <b>&lt;0.001</b> | 1.20                    | 1.14, 1.26          | <b>&lt;0.001</b> |
| Number of F-Diagnoses                                           | 1.00                        | 0.97, 1.04          | 0.89             | 1.02                    | 0.98, 1.06          | 0.30             |
| Sitting_time                                                    |                             |                     |                  |                         |                     |                  |
| 01_less than half of the day                                    | —                           | —                   |                  | —                       | —                   |                  |
| 02_half of the day                                              | 1.21                        | 0.81, 1.82          | 0.35             | 0.93                    | 0.58, 1.47          | 0.75             |
| 03_at least 3/4 of the day                                      | 0.97                        | 0.64, 1.49          | 0.90             | 0.73                    | 0.45, 1.19          | 0.21             |
| 04_almost all day                                               | 1.19                        | 0.72, 1.97          | 0.50             | 1.00                    | 0.56, 1.79          | >0.99            |
| Job Status                                                      |                             |                     |                  |                         |                     |                  |
| 01_unemployed                                                   | —                           | —                   |                  | —                       | —                   |                  |
| 02_self employed                                                | 1.19                        | 0.68, 2.08          | 0.55             | 0.97                    | 0.52, 1.80          | 0.92             |
| 03_regularly employed                                           | 1.04                        | 0.64, 1.70          | 0.87             | 0.74                    | 0.43, 1.27          | 0.27             |
| wscore                                                          | 0.96                        | 0.84, 1.10          | 0.58             | 1.05                    | 0.91, 1.20          | 0.51             |

<sup>1</sup>OR = Odds Ratio, CI = Confidence Interval

### Appendix 1.3 - Adjusted Modell - Pain Disability - Sex = Male

| <i>Appendix 1.3 - Adjusted Modell - Pain Disability - Sex = Male</i> |                             |                     |                  |                         |                     |                  |
|----------------------------------------------------------------------|-----------------------------|---------------------|------------------|-------------------------|---------------------|------------------|
| Characteristic                                                       | 02 moderate pain disability |                     |                  | 03 high pain disability |                     |                  |
|                                                                      | OR <sup>1</sup>             | 95% CI <sup>1</sup> | p-value          | OR <sup>1</sup>         | 95% CI <sup>1</sup> | p-value          |
| Overall health                                                       |                             |                     |                  |                         |                     |                  |
| 01_Very good                                                         | —                           | —                   |                  | —                       | —                   |                  |
| 02_good                                                              | 1.95                        | 1.45, 2.63          | <b>&lt;0.001</b> | 1.98                    | 1.34, 2.93          | <b>&lt;0.001</b> |
| 03_bad                                                               | 5.44                        | 3.63, 8.15          | <b>&lt;0.001</b> | 10.0                    | 6.27, 16.0          | <b>&lt;0.001</b> |
| PHQ-4                                                                | 1.26                        | 1.18, 1.34          | <b>&lt;0.001</b> | 1.55                    | 1.45, 1.66          | <b>&lt;0.001</b> |
| Activity days per week                                               |                             |                     |                  |                         |                     |                  |
| 00_never                                                             | —                           | —                   |                  | —                       | —                   |                  |
| 01_1day_per_wk                                                       | 0.60                        | 0.37, 0.99          | <b>0.044</b>     | 0.55                    | 0.32, 0.94          | <b>0.029</b>     |
| 02_2days_per_wk                                                      | 0.83                        | 0.52, 1.35          | 0.46             | 0.70                    | 0.41, 1.18          | 0.18             |
| 03_3days_per_wk                                                      | 0.96                        | 0.58, 1.59          | 0.88             | 0.83                    | 0.48, 1.45          | 0.51             |
| 04_four or more                                                      | 0.85                        | 0.50, 1.43          | 0.54             | 0.93                    | 0.53, 1.63          | 0.79             |
| Sport days per week                                                  |                             |                     |                  |                         |                     |                  |
| 01_no sports                                                         | —                           | —                   |                  | —                       | —                   |                  |
| 02_less than two h per week                                          | 0.83                        | 0.58, 1.21          | 0.33             | 0.74                    | 0.50, 1.10          | 0.14             |
| 03_two to 4h per week                                                | 0.88                        | 0.60, 1.28          | 0.50             | 0.68                    | 0.45, 1.03          | <b>0.068</b>     |
| 04_more than four h per week                                         | 0.55                        | 0.36, 0.85          | <b>0.007</b>     | 0.49                    | 0.31, 0.79          | <b>0.003</b>     |
| Duration physical activity                                           |                             |                     |                  |                         |                     |                  |
| 01_less than ten minutes                                             | —                           | —                   |                  | —                       | —                   |                  |
| 02_10 to 30 minutes                                                  | 1.17                        | 0.68, 2.02          | 0.57             | 1.28                    | 0.72, 2.29          | 0.40             |
| 03_30 to 60 minutes                                                  | 1.15                        | 0.67, 1.97          | 0.61             | 1.07                    | 0.60, 1.91          | 0.81             |
| 04_more than 60 minutes                                              | 1.21                        | 0.70, 2.09          | 0.49             | 1.08                    | 0.60, 1.95          | 0.79             |
| Age                                                                  | 1.00                        | 0.99, 1.01          | 0.91             | 1.01                    | 1.00, 1.03          | 0.13             |
| Number of M-Diagnoses                                                | 1.06                        | 1.03, 1.09          | <b>&lt;0.001</b> | 1.16                    | 1.12, 1.19          | <b>&lt;0.001</b> |
| Number of F-Diagnoses                                                | 0.98                        | 0.95, 1.01          | 0.16             | 0.96                    | 0.93, 0.99          | <b>0.012</b>     |
| Sitting time                                                         |                             |                     |                  |                         |                     |                  |
| 01_less than half of the day                                         | —                           | —                   |                  | —                       | —                   |                  |
| 02_half of the day                                                   | 0.92                        | 0.66, 1.28          | 0.62             | 0.76                    | 0.53, 1.11          | 0.15             |
| 03_at least 3/4 of the day                                           | 1.06                        | 0.76, 1.47          | 0.73             | 0.66                    | 0.46, 0.95          | <b>0.025</b>     |
| 04_almost all day                                                    | 0.89                        | 0.61, 1.29          | 0.53             | 0.71                    | 0.47, 1.07          | 0.10             |
| Job Status                                                           |                             |                     |                  |                         |                     |                  |
| 01_unemployed                                                        | —                           | —                   |                  | —                       | —                   |                  |
| 02_self employed                                                     | 1.16                        | 0.62, 2.17          | 0.64             | 1.30                    | 0.64, 2.65          | 0.46             |
| 03_regularly employed                                                | 1.22                        | 0.67, 2.22          | 0.52             | 1.18                    | 0.59, 2.34          | 0.64             |
| wscore                                                               | 0.96                        | 0.89, 1.05          | 0.39             | 0.95                    | 0.87, 1.04          | 0.25             |

<sup>1</sup>OR = Odds Ratio, CI = Confidence Interval

## Appendix 2: Pain Intensity

### Appendix 2.1 - Adjusted Modell - Pain Intensity

| <i>Appendix 2.1 - Adjusted Modell - Pain Intensity</i> |                 |                     |              |
|--------------------------------------------------------|-----------------|---------------------|--------------|
| Characteristic                                         | OR <sup>1</sup> | 95% CI <sup>1</sup> | p-value      |
| <b>Overall health</b>                                  |                 |                     |              |
| 01_Very good                                           | —               | —                   |              |
| 02_good                                                | 1.65            | 1.33, 2.06          | <0.001       |
| 03_bad                                                 | 4.28            | 3.30, 5.58          | <0.001       |
| <b>PHQ-4</b>                                           | 1.27            | 1.22, 1.32          | <0.001       |
| <b>Activity days per week</b>                          |                 |                     |              |
| 00_never                                               | —               | —                   |              |
| 01_1day_per_wk                                         | 0.70            | 0.50, 0.98          | <b>0.036</b> |
| 02_2days_per_wk                                        | 0.65            | 0.46, 0.91          | <b>0.011</b> |
| 03_3days_per_wk                                        | 0.84            | 0.59, 1.20          | 0.34         |
| 04_four or more                                        | 0.98            | 0.69, 1.40          | 0.91         |
| <b>Sport days per week</b>                             |                 |                     |              |
| 01_no sports                                           | —               | —                   |              |
| 02_less than two h per week                            | 0.93            | 0.72, 1.19          | 0.55         |
| 03_two to 4h per week                                  | 0.89            | 0.69, 1.15          | 0.36         |
| 04_more than four h per week                           | 0.66            | 0.49, 0.89          | <b>0.007</b> |
| <b>Duration physical activity</b>                      |                 |                     |              |
| 01_less than ten minutes                               | —               | —                   |              |
| 02_10 to 30 minutes                                    | 1.13            | 0.79, 1.62          | 0.50         |
| 03_30 to 60 minutes                                    | 1.06            | 0.74, 1.51          | 0.75         |
| 04_more than 60 minutes                                | 1.24            | 0.86, 1.78          | 0.24         |
| <b>Sex</b>                                             |                 |                     |              |
| M                                                      | —               | —                   |              |
| W                                                      | 1.20            | 1.02, 1.41          | <b>0.025</b> |
| <b>Age</b>                                             | 1.00            | 0.99, 1.01          | 0.60         |
| <b>Number of M-Diagnoses</b>                           | 1.06            | 1.04, 1.08          | <0.001       |
| <b>Number of F-Diagnoses</b>                           | 0.97            | 0.95, 0.99          | <0.001       |
| <b>Sitting_time</b>                                    |                 |                     |              |
| 01_less than half of the day                           | —               | —                   |              |
| 02_half of the day                                     | 0.86            | 0.69, 1.07          | 0.18         |
| 03_at least 3/4 of the day                             | 0.99            | 0.80, 1.23          | 0.92         |
| 04_almost all day                                      | 0.96            | 0.74, 1.23          | 0.72         |
| <b>Job Status</b>                                      |                 |                     |              |
| 01_unemployed                                          | —               | —                   |              |
| 02_self_employed                                       | 1.32            | 0.94, 1.85          | 0.11         |
| 03_regularly_employed                                  | 1.22            | 0.89, 1.67          | 0.22         |
| <b>wscore</b>                                          | 0.98            | 0.93, 1.04          | 0.51         |

<sup>1</sup>OR = Odds Ratio, CI = Confidence Interval

## Appendix 2.2 - Adjusted Modell - Pain Intensity - Sex = Female

| <i>Appendix 2.2 - Adjusted Modell - Pain Intensity - Sex = Female</i> |                 |                     |                  |
|-----------------------------------------------------------------------|-----------------|---------------------|------------------|
| Characteristic                                                        | OR <sup>1</sup> | 95% CI <sup>1</sup> | p-value          |
| <b>Overall health</b>                                                 |                 |                     |                  |
| 01_Very good                                                          | —               | —                   |                  |
| 02_good                                                               | 1.89            | 1.31, 2.75          | <b>&lt;0.001</b> |
| 03_bad                                                                | 4.05            | 2.63, 6.28          | <b>&lt;0.001</b> |
| <b>PHQ-4</b>                                                          | 1.25            | 1.18, 1.34          | <b>&lt;0.001</b> |
| <b>Activity days per week</b>                                         |                 |                     |                  |
| 00_never                                                              | —               | —                   |                  |
| 01_1day_per_wk                                                        | 1.05            | 0.57, 1.91          | 0.88             |
| 02_2days_per_wk                                                       | 0.76            | 0.40, 1.41          | 0.38             |
| 03_3days_per_wk                                                       | 1.10            | 0.58, 2.10          | 0.77             |
| 04_four or more                                                       | 1.35            | 0.70, 2.60          | 0.37             |
| <b>Sport days per week</b>                                            |                 |                     |                  |
| 01_no sports                                                          | —               | —                   |                  |
| 02_less than two h per week                                           | 0.81            | 0.51, 1.27          | 0.36             |
| 03_two to 4h per week                                                 | 0.71            | 0.44, 1.14          | 0.16             |
| 04_more than four h per week                                          | 0.37            | 0.21, 0.65          | <b>&lt;0.001</b> |
| <b>Duration physical activity</b>                                     |                 |                     |                  |
| 01_less than ten minutes                                              | —               | —                   |                  |
| 02_10 to 30 minutes                                                   | 0.98            | 0.51, 1.87          | 0.95             |
| 03_30 to 60 minutes                                                   | 1.06            | 0.57, 1.98          | 0.86             |
| 04_more than 60 minutes                                               | 1.40            | 0.74, 2.67          | 0.30             |
| <b>Age</b>                                                            | 1.00            | 0.99, 1.01          | 0.84             |
| <b>Number of M-Diagnoses</b>                                          | 1.06            | 1.03, 1.10          | <b>&lt;0.001</b> |
| <b>Number of F-Diagnoses</b>                                          | 0.97            | 0.94, 0.99          | <b>0.005</b>     |
| <b>Sitting time</b>                                                   |                 |                     |                  |
| 01_less than half of the day                                          | —               | —                   |                  |
| 02_half of the day                                                    | 0.85            | 0.60, 1.19          | 0.34             |
| 03_at least 3/4 of the day                                            | 0.90            | 0.62, 1.28          | 0.55             |
| 04_almost all day                                                     | 1.01            | 0.66, 1.55          | 0.97             |
| <b>Job Status</b>                                                     |                 |                     |                  |
| 01_unemployed                                                         | —               | —                   |                  |
| 02_self_employed                                                      | 1.18            | 0.74, 1.89          | 0.48             |
| 03_regularly_employed                                                 | 1.07            | 0.70, 1.61          | 0.76             |
| <b>wscore</b>                                                         | 0.96            | 0.87, 1.06          | 0.43             |

<sup>1</sup>OR = Odds Ratio, CI = Confidence Interval

### Appendix 2.3 - Adjusted Modell - Pain Intensity - Sex = Male

| <i>Appendix 2.3 - Adjusted Modell - Pain Intensity - Sex = Male</i> |                 |                     |                  |
|---------------------------------------------------------------------|-----------------|---------------------|------------------|
| Characteristic                                                      | OR <sup>1</sup> | 95% CI <sup>1</sup> | p-value          |
| <b>Overall health</b>                                               |                 |                     |                  |
| 01_ <i>Very good</i>                                                | —               | —                   |                  |
| 02_ <i>good</i>                                                     | 1.57            | 1.20, 2.08          | <b>0.001</b>     |
| 03_ <i>bad</i>                                                      | 4.62            | 3.32, 6.46          | <b>&lt;0.001</b> |
| <b>PHQ-4</b>                                                        | 1.28            | 1.22, 1.34          | <b>&lt;0.001</b> |
| <b>Activity days per week</b>                                       |                 |                     |                  |
| 00_ <i>never</i>                                                    | —               | —                   |                  |
| 01_ <i>1day_per_wk</i>                                              | 0.56            | 0.37, 0.83          | <b>0.005</b>     |
| 02_ <i>2days_per_wk</i>                                             | 0.62            | 0.41, 0.92          | <b>0.017</b>     |
| 03_ <i>3days_per_wk</i>                                             | 0.76            | 0.50, 1.15          | 0.19             |
| 04_ <i>four or more</i>                                             | 0.86            | 0.56, 1.32          | 0.49             |
| <b>Sport days per week</b>                                          |                 |                     |                  |
| 01_ <i>no sports</i>                                                | —               | —                   |                  |
| 02_ <i>less than two h per week</i>                                 | 0.95            | 0.71, 1.29          | 0.76             |
| 03_ <i>two to 4h per week</i>                                       | 0.97            | 0.71, 1.32          | 0.83             |
| 04_ <i>more than four h per week</i>                                | 0.85            | 0.59, 1.21          | 0.36             |
| <b>Duration physical activity</b>                                   |                 |                     |                  |
| 01_ <i>less than ten minutes</i>                                    | —               | —                   |                  |
| 02_ <i>10 to 30 minutes</i>                                         | 1.23            | 0.79, 1.90          | 0.36             |
| 03_ <i>30 to 60 minutes</i>                                         | 1.04            | 0.67, 1.62          | 0.84             |
| 04_ <i>more than 60 minutes</i>                                     | 1.17            | 0.75, 1.82          | 0.50             |
| <b>Age</b>                                                          | 0.99            | 0.98, 1.01          | 0.33             |
| <b>Number of M-Diagnoses</b>                                        | 1.06            | 1.04, 1.08          | <b>&lt;0.001</b> |
| <b>Number of F-Diagnoses</b>                                        | 0.98            | 0.95, 1.00          | <b>0.078</b>     |
| <b>Sitting time</b>                                                 |                 |                     |                  |
| 01_ <i>less than half of the day</i>                                | —               | —                   |                  |
| 02_ <i>half of the day</i>                                          | 0.87            | 0.65, 1.16          | 0.33             |
| 03_ <i>at least 3/4 of the day</i>                                  | 1.02            | 0.77, 1.35          | 0.88             |
| 04_ <i>almost all day</i>                                           | 0.94            | 0.68, 1.29          | 0.68             |
| <b>Job Status</b>                                                   |                 |                     |                  |
| 01_ <i>unemployed</i>                                               | —               | —                   |                  |
| 02_ <i>self employed</i>                                            | 1.70            | 0.99, 2.95          | <b>0.055</b>     |
| 03_ <i>regularly employed</i>                                       | 1.59            | 0.95, 2.72          | <b>0.082</b>     |
| <b>wscore</b>                                                       | 0.99            | 0.92, 1.06          | 0.70             |

<sup>1</sup>OR = Odds Ratio, CI = Confidence Interval

## Appendix 3: Subgroup analyses

### Appendix 3.1 - Adjusted Modell - Pain Disability – Pre Covid

| <i>Appendix 3.1 - Adjusted Modell - Pain Disability – Pre Covid</i> |                             |                     |                  |                         |                     |                  |
|---------------------------------------------------------------------|-----------------------------|---------------------|------------------|-------------------------|---------------------|------------------|
| Characteristic                                                      | 02_moderate pain disability |                     |                  | 03_high pain disability |                     |                  |
|                                                                     | OR <sup>1</sup>             | 95% CI <sup>1</sup> | p-value          | OR <sup>1</sup>         | 95% CI <sup>1</sup> | p-value          |
| Overall health                                                      |                             |                     |                  |                         |                     |                  |
| 01_Very good                                                        | —                           | —                   |                  | —                       | —                   |                  |
| 02_good                                                             | 1.42                        | 0.98, 2.06          | <b>0.064</b>     | 1.96                    | 1.23, 3.13          | <b>0.004</b>     |
| 03_bad                                                              | 4.30                        | 2.73, 6.76          | <b>&lt;0.001</b> | 9.34                    | 5.54, 15.8          | <b>&lt;0.001</b> |
| PHQ-4                                                               | 1.16                        | 1.08, 1.24          | <b>&lt;0.001</b> | 1.42                    | 1.33, 1.52          | <b>&lt;0.001</b> |
| Activity days per week                                              |                             |                     |                  |                         |                     |                  |
| 00_never                                                            | —                           | —                   |                  | —                       | —                   |                  |
| 01_1day_per_wk                                                      | 0.80                        | 0.48, 1.34          | 0.41             | 0.68                    | 0.40, 1.17          | 0.16             |
| 02_2days_per_wk                                                     | 0.77                        | 0.46, 1.29          | 0.32             | 0.80                    | 0.47, 1.36          | 0.41             |
| 03_3days_per_wk                                                     | 0.80                        | 0.47, 1.37          | 0.42             | 0.85                    | 0.48, 1.49          | 0.56             |
| 04_four or more                                                     | 0.93                        | 0.53, 1.62          | 0.79             | 1.23                    | 0.69, 2.20          | 0.48             |
| Sport days per week                                                 |                             |                     |                  |                         |                     |                  |
| 01_no sports                                                        | —                           | —                   |                  | —                       | —                   |                  |
| 02_less than two h per week                                         | 1.01                        | 0.68, 1.49          | 0.97             | 0.80                    | 0.54, 1.18          | 0.26             |
| 03_two to 4h per week                                               | 1.13                        | 0.76, 1.68          | 0.54             | 0.80                    | 0.54, 1.21          | 0.29             |
| 04_more than four h per week                                        | 0.71                        | 0.45, 1.13          | 0.15             | 0.57                    | 0.36, 0.92          | <b>0.021</b>     |
| Duration physical activity                                          |                             |                     |                  |                         |                     |                  |
| 01_less than ten minutes                                            | —                           | —                   |                  | —                       | —                   |                  |
| 02_10 to 30 minutes                                                 | 0.76                        | 0.43, 1.36          | 0.36             | 0.87                    | 0.48, 1.57          | 0.64             |
| 03_30 to 60 minutes                                                 | 0.81                        | 0.46, 1.42          | 0.47             | 0.86                    | 0.48, 1.55          | 0.62             |
| 04_more than 60 minutes                                             | 0.91                        | 0.51, 1.61          | 0.74             | 0.80                    | 0.44, 1.46          | 0.47             |
| Sex                                                                 |                             |                     |                  |                         |                     |                  |
| M                                                                   | —                           | —                   |                  | —                       | —                   |                  |
| W                                                                   | 0.97                        | 0.74, 1.26          | 0.80             | 0.95                    | 0.72, 1.26          | 0.72             |
| Age                                                                 | 1.00                        | 0.99, 1.02          | 0.75             | 1.01                    | 1.00, 1.03          | 0.14             |
| Number of M-Diagnoses                                               | 1.05                        | 1.02, 1.07          | <b>0.002</b>     | 1.13                    | 1.10, 1.16          | <b>&lt;0.001</b> |
| Number of F-Diagnoses                                               | 0.99                        | 0.96, 1.01          | 0.31             | 0.98                    | 0.95, 1.00          | <b>0.090</b>     |
| Sitting_time                                                        |                             |                     |                  |                         |                     |                  |
| 01_less than half of the day                                        | —                           | —                   |                  | —                       | —                   |                  |
| 02_half of the day                                                  | 0.96                        | 0.68, 1.35          | 0.83             | 0.84                    | 0.59, 1.20          | 0.34             |
| 03_at least 3/4 of the day                                          | 1.00                        | 0.71, 1.42          | 0.98             | 0.77                    | 0.53, 1.11          | 0.16             |
| 04_almost all day                                                   | 0.96                        | 0.64, 1.44          | 0.83             | 0.84                    | 0.55, 1.29          | 0.44             |
| Job Status                                                          |                             |                     |                  |                         |                     |                  |
| 01_unemployed                                                       | —                           | —                   |                  | —                       | —                   |                  |
| 02_self_employed                                                    | 0.78                        | 0.44, 1.40          | 0.41             | 0.79                    | 0.43, 1.46          | 0.45             |
| 03_regularly_employed                                               | 0.94                        | 0.54, 1.64          | 0.84             | 0.83                    | 0.46, 1.50          | 0.54             |
| Wscore                                                              | 0.92                        | 0.85, 0.99          | <b>0.037</b>     | 0.90                    | 0.82, 0.98          | <b>0.011</b>     |

<sup>1</sup>OR = Odds Ratio, CI = Confidence Interval



### Appendix 3.2 - Adjusted Modell - Pain Disability – During Covid

| <i>Appendix 3.2 - Adjusted Modell - Pain Disability - During Covid</i> |                             |                     |                |                         |                     |                |
|------------------------------------------------------------------------|-----------------------------|---------------------|----------------|-------------------------|---------------------|----------------|
| Characteristic                                                         | 02 moderate pain disability |                     |                | 03 high pain disability |                     |                |
|                                                                        | OR <sup>1</sup>             | 95% CI <sup>1</sup> | p-value        | OR <sup>1</sup>         | 95% CI <sup>1</sup> | p-value        |
| Overall health                                                         |                             |                     |                |                         |                     |                |
| 01_Very good                                                           | —                           | —                   |                | —                       | —                   |                |
| 02_good                                                                | 1.98                        | 1.43, 2.74          | < <b>0.001</b> | 1.42                    | 0.88, 2.28          | 0.15           |
| 03_bad                                                                 | 4.68                        | 2.88, 7.61          | < <b>0.001</b> | 7.19                    | 3.98, 13.0          | < <b>0.001</b> |
| PHQ-4                                                                  | 1.35                        | 1.25, 1.46          | < <b>0.001</b> | 1.73                    | 1.58, 1.90          | < <b>0.001</b> |
| Activity days per week                                                 |                             |                     |                |                         |                     |                |
| 00_never                                                               | —                           | —                   |                | —                       | —                   |                |
| 01_1day_per_wk                                                         | 0.49                        | 0.25, 0.96          | <b>0.037</b>   | 0.52                    | 0.23, 1.19          | 0.12           |
| 02_2days_per_wk                                                        | 0.61                        | 0.31, 1.20          | 0.16           | 0.59                    | 0.25, 1.37          | 0.22           |
| 03_3days_per_wk                                                        | 0.78                        | 0.39, 1.58          | 0.49           | 0.74                    | 0.31, 1.81          | 0.51           |
| 04_four or more                                                        | 0.59                        | 0.28, 1.21          | 0.15           | 0.96                    | 0.39, 2.36          | 0.94           |
| Sport days per week                                                    |                             |                     |                |                         |                     |                |
| 01_no sports                                                           | —                           | —                   |                | —                       | —                   |                |
| 02_less than two h per week                                            | 0.73                        | 0.44, 1.23          | 0.24           | 0.87                    | 0.47, 1.62          | 0.66           |
| 03_two to 4h per week                                                  | 0.62                        | 0.36, 1.08          | <b>0.090</b>   | 0.42                    | 0.22, 0.83          | <b>0.012</b>   |
| 04_more than four h per week                                           | 0.38                        | 0.20, 0.71          | <b>0.002</b>   | 0.29                    | 0.13, 0.64          | <b>0.002</b>   |
| Duration physical activity                                             |                             |                     |                |                         |                     |                |
| 01_less than ten minutes                                               | —                           | —                   |                | —                       | —                   |                |
| 02_10 to 30 minutes                                                    | 1.39                        | 0.67, 2.87          | 0.38           | 1.60                    | 0.67, 3.84          | 0.29           |
| 03_30 to 60 minutes                                                    | 1.65                        | 0.80, 3.40          | 0.18           | 1.43                    | 0.60, 3.43          | 0.42           |
| 04_more than 60 minutes                                                | 1.78                        | 0.86, 3.72          | 0.12           | 1.50                    | 0.61, 3.69          | 0.38           |
| Sex                                                                    |                             |                     |                |                         |                     |                |
| M                                                                      | —                           | —                   |                | —                       | —                   |                |
| W                                                                      | 0.86                        | 0.66, 1.14          | 0.30           | 0.85                    | 0.59, 1.22          | 0.38           |
| Age                                                                    | 1.00                        | 0.99, 1.02          | 0.88           | 1.02                    | 1.00, 1.04          | <b>0.057</b>   |
| Number of M-Diagnoses                                                  | 1.09                        | 1.04, 1.14          | < <b>0.001</b> | 1.23                    | 1.17, 1.29          | < <b>0.001</b> |
| Number of F-Diagnoses                                                  | 0.95                        | 0.88, 1.02          | 0.18           | 0.96                    | 0.89, 1.03          | 0.27           |
| Sitting_time                                                           |                             |                     |                |                         |                     |                |
| 01_less than half of the day                                           | —                           | —                   |                | —                       | —                   |                |
| 02_half of the day                                                     | 1.10                        | 0.73, 1.65          | 0.65           | 0.75                    | 0.45, 1.26          | 0.28           |
| 03_at least 3/4 of the day                                             | 1.18                        | 0.80, 1.74          | 0.41           | 0.63                    | 0.38, 1.03          | <b>0.067</b>   |
| 04_almost all day                                                      | 0.99                        | 0.63, 1.55          | 0.95           | 0.75                    | 0.43, 1.33          | 0.33           |
| Job Status                                                             |                             |                     |                |                         |                     |                |
| 01_unemployed                                                          | —                           | —                   |                | —                       | —                   |                |
| 02_self_employed                                                       | 1.55                        | 0.84, 2.87          | 0.16           | 1.21                    | 0.56, 2.58          | 0.63           |
| 03_regularly_employed                                                  | 1.18                        | 0.68, 2.05          | 0.55           | 0.87                    | 0.44, 1.73          | 0.69           |
| wscore                                                                 | 1.01                        | 0.87, 1.17          | 0.92           | 1.05                    | 0.88, 1.26          | 0.61           |

<sup>1</sup>OR = Odds Ratio, CI = Confidence Interval

### Appendix 3.3 - Adjusted Modell - Pain Intensity – Pre Covid

| <i>Appendix 3.3 - Adjusted Modell - Pain Intensity – Pre Covid</i> |                 |                     |                  |
|--------------------------------------------------------------------|-----------------|---------------------|------------------|
| Characteristic                                                     | OR <sup>1</sup> | 95% CI <sup>1</sup> | p-value          |
| <b>Overall health</b>                                              |                 |                     |                  |
| 01_ <i>Very good</i>                                               | —               | —                   |                  |
| 02_ <i>good</i>                                                    | 1.32            | 0.94, 1.87          | 0.11             |
| 03_ <i>bad</i>                                                     | 3.60            | 2.48, 5.27          | <b>&lt;0.001</b> |
| <b>PHQ-4</b>                                                       | 1.22            | 1.16, 1.28          | <b>&lt;0.001</b> |
| <b>Activity days per week</b>                                      |                 |                     |                  |
| 00_ <i>never</i>                                                   | —               | —                   |                  |
| 01_ <i>1day_per_wk</i>                                             | 0.71            | 0.47, 1.06          | <b>0.10</b>      |
| 02_ <i>2days_per_wk</i>                                            | 0.75            | 0.50, 1.12          | 0.16             |
| 03_ <i>3days_per_wk</i>                                            | 0.90            | 0.59, 1.37          | 0.62             |
| 04_ <i>four or more</i>                                            | 1.07            | 0.69, 1.65          | 0.77             |
| <b>Sport days per week</b>                                         |                 |                     |                  |
| 01_ <i>no sports</i>                                               | —               | —                   |                  |
| 02_ <i>less than two h per week</i>                                | 0.89            | 0.66, 1.20          | 0.44             |
| 03_ <i>two to 4h per week</i>                                      | 0.91            | 0.67, 1.24          | 0.55             |
| 04_ <i>more than four h per week</i>                               | 0.65            | 0.45, 0.94          | <b>0.022</b>     |
| <b>Duration physical activity</b>                                  |                 |                     |                  |
| 01_ <i>less than ten minutes</i>                                   | —               | —                   |                  |
| 02_ <i>10 to 30 minutes</i>                                        | 1.08            | 0.69, 1.67          | 0.74             |
| 03_ <i>30 to 60 minutes</i>                                        | 1.02            | 0.66, 1.57          | 0.94             |
| 04_ <i>more than 60 minutes</i>                                    | 1.11            | 0.71, 1.72          | 0.66             |
| <b>Sex</b>                                                         |                 |                     |                  |
| M                                                                  | —               | —                   |                  |
| W                                                                  | 1.14            | 0.92, 1.41          | 0.24             |
| <b>Age</b>                                                         | 1.00            | 0.99, 1.01          | 0.84             |
| <b>Number of M-Diagnoses</b>                                       | 1.05            | 1.04, 1.07          | <b>&lt;0.001</b> |
| <b>Number of F-Diagnoses</b>                                       | 0.97            | 0.96, 0.99          | <b>0.005</b>     |
| <b>Sitting time</b>                                                |                 |                     |                  |
| 01_ <i>less than half of the day</i>                               | —               | —                   |                  |
| 02_ <i>half of the day</i>                                         | 0.85            | 0.64, 1.11          | 0.23             |
| 03_ <i>at least 3/4 of the day</i>                                 | 0.96            | 0.73, 1.27          | 0.79             |
| 04_ <i>almost all day</i>                                          | 0.96            | 0.69, 1.34          | 0.82             |
| <b>Job Status</b>                                                  |                 |                     |                  |
| 01_ <i>unemployed</i>                                              | —               | —                   |                  |
| 02_ <i>self employed</i>                                           | 1.51            | 0.95, 2.39          | <b>0.079</b>     |
| 03_ <i>regularly employed</i>                                      | 1.32            | 0.85, 2.05          | 0.22             |
| <b>wscore</b>                                                      | 0.97            | 0.91, 1.03          | 0.30             |

<sup>1</sup>OR = Odds Ratio, CI = Confidence Interval

### Appendix 3.4 - Adjusted Modell - Pain Intensity – During Covid

Appendix 3.4 - Adjusted Modell - Pain Intensity – During Covid

| Characteristic                       | OR <sup>1</sup> | 95% CI <sup>1</sup> | p-value      |
|--------------------------------------|-----------------|---------------------|--------------|
| <b>Overall health</b>                |                 |                     |              |
| 01_ <i>Very good</i>                 | —               | —                   |              |
| 02_ <i>good</i>                      | 1.81            | 1.34, 2.46          | <0.001       |
| 03_ <i>bad</i>                       | 4.43            | 2.94, 6.74          | <0.001       |
| <b>PHQ-4</b>                         | 1.36            | 1.28, 1.46          | <0.001       |
| <b>Activity days per week</b>        |                 |                     |              |
| 00_ <i>never</i>                     | —               | —                   |              |
| 01_ <i>1day per wk</i>               | 0.72            | 0.39, 1.30          | 0.27         |
| 02_ <i>2days per wk</i>              | 0.54            | 0.29, 0.98          | <b>0.044</b> |
| 03_ <i>3days per wk</i>              | 0.79            | 0.42, 1.48          | 0.45         |
| 04_ <i>four or more</i>              | 0.92            | 0.48, 1.76          | 0.81         |
| <b>Sport days per week</b>           |                 |                     |              |
| 01_ <i>no sports</i>                 | —               | —                   |              |
| 02_ <i>less than two h per week</i>  | 1.02            | 0.65, 1.60          | 0.94         |
| 03_ <i>two to 4h per week</i>        | 0.87            | 0.54, 1.41          | 0.58         |
| 04_ <i>more than four h per week</i> | 0.67            | 0.38, 1.17          | 0.16         |
| <b>Duration physical activity</b>    |                 |                     |              |
| 01_ <i>less than ten minutes</i>     | —               | —                   |              |
| 02_ <i>10 to 30 minutes</i>          | 1.17            | 0.62, 2.22          | 0.64         |
| 03_ <i>30 to 60 minutes</i>          | 1.10            | 0.58, 2.09          | 0.76         |
| 04_ <i>more than 60 minutes</i>      | 1.41            | 0.74, 2.71          | 0.30         |
| <b>Sex</b>                           |                 |                     |              |
| M                                    | —               | —                   |              |
| W                                    | 1.31            | 1.02, 1.68          | <b>0.035</b> |
| <b>Age</b>                           | 1.00            | 0.99, 1.01          | 0.85         |
| <b>Number of M-Diagnoses</b>         | 1.07            | 1.03, 1.11          | <0.001       |
| <b>Number of F-Diagnoses</b>         | 0.97            | 0.92, 1.04          | 0.40         |
| <b>Sitting time</b>                  |                 |                     |              |
| 01_ <i>less than half of the day</i> | —               | —                   |              |
| 02_ <i>half of the day</i>           | 0.91            | 0.64, 1.31          | 0.62         |
| 03_ <i>at least 3/4 of the day</i>   | 1.04            | 0.73, 1.48          | 0.82         |
| 04_ <i>almost all day</i>            | 0.94            | 0.63, 1.41          | 0.78         |
| <b>Job Status</b>                    |                 |                     |              |
| 01_ <i>unemployed</i>                | —               | —                   |              |
| 02_ <i>self employed</i>             | 1.08            | 0.63, 1.86          | 0.79         |
| 03_ <i>regularly employed</i>        | 1.16            | 0.71, 1.88          | 0.56         |
| <b>wscore</b>                        | 1.03            | 0.90, 1.18          | 0.65         |

<sup>1</sup>OR = Odds Ratio, CI = Confidence Interval

## Appendix 4: Sensitivity analyses

### Appendix 4.1 - Adjusted Modell - Pain Disability – Pre Covid - Sensitivity

| <i>Appendix 4.1 - Adjusted Modell - Pain Disability – Pre Covid - Sensitivity</i> |                             |                     |                  |                         |                     |                  |
|-----------------------------------------------------------------------------------|-----------------------------|---------------------|------------------|-------------------------|---------------------|------------------|
| Characteristic                                                                    | 02 moderate pain disability |                     |                  | 03 high pain disability |                     |                  |
|                                                                                   | OR <sup>1</sup>             | 95% CI <sup>1</sup> | p-value          | OR <sup>1</sup>         | 95% CI <sup>1</sup> | p-value          |
| Overall health                                                                    |                             |                     |                  |                         |                     |                  |
| 01_Very good                                                                      | —                           | —                   |                  | —                       | —                   |                  |
| 02_good                                                                           | 1.55                        | 0.98, 2.46          | <b>0.062</b>     | 2.80                    | 1.52, 5.15          | <b>&lt;0.001</b> |
| 03_bad                                                                            | 4.31                        | 2.48, 7.50          | <b>&lt;0.001</b> | 13.1                    | 6.71, 25.7          | <b>&lt;0.001</b> |
| PHQ-4                                                                             | 1.12                        | 1.03, 1.22          | <b>0.006</b>     | 1.44                    | 1.33, 1.56          | <b>&lt;0.001</b> |
| Activity days per week                                                            |                             |                     |                  |                         |                     |                  |
| 00_never                                                                          | —                           | —                   |                  | —                       | —                   |                  |
| 01_1day per wk                                                                    | 0.77                        | 0.41, 1.47          | 0.43             | 0.73                    | 0.37, 1.44          | 0.36             |
| 02_2days per wk                                                                   | 0.65                        | 0.34, 1.24          | 0.19             | 0.72                    | 0.37, 1.40          | 0.33             |
| 03_3days per wk                                                                   | 0.59                        | 0.30, 1.14          | 0.12             | 0.71                    | 0.35, 1.43          | 0.34             |
| 04_four or more                                                                   | 0.79                        | 0.39, 1.57          | 0.49             | 1.03                    | 0.51, 2.12          | 0.93             |
| Sport days per week                                                               |                             |                     |                  |                         |                     |                  |
| 01_no sports                                                                      | —                           | —                   |                  | —                       | —                   |                  |
| 02_less than two h per week                                                       | 0.97                        | 0.61, 1.56          | 0.91             | 0.78                    | 0.48, 1.25          | 0.30             |
| 03_two to 4h per week                                                             | 1.27                        | 0.79, 2.06          | 0.33             | 0.98                    | 0.60, 1.59          | 0.92             |
| 04_more than four h per week                                                      | 0.77                        | 0.44, 1.35          | 0.36             | 0.66                    | 0.37, 1.18          | 0.17             |
| Duration physical activity                                                        |                             |                     |                  |                         |                     |                  |
| 01_less than ten minutes                                                          | —                           | —                   |                  | —                       | —                   |                  |
| 02_10 to 30 minutes                                                               | 0.89                        | 0.44, 1.80          | 0.75             | 1.03                    | 0.50, 2.12          | 0.94             |
| 03_30 to 60 minutes                                                               | 1.06                        | 0.53, 2.12          | 0.87             | 1.06                    | 0.52, 2.16          | 0.88             |
| 04_more than 60 minutes                                                           | 1.06                        | 0.53, 2.14          | 0.86             | 1.14                    | 0.55, 2.34          | 0.73             |
| Sex                                                                               |                             |                     |                  |                         |                     |                  |
| M                                                                                 | —                           | —                   |                  | —                       | —                   |                  |
| W                                                                                 | 0.90                        | 0.65, 1.26          | 0.54             | 1.02                    | 0.72, 1.44          | 0.93             |
| Age                                                                               | 1.00                        | 0.98, 1.02          | 0.88             | 1.01                    | 0.99, 1.03          | 0.53             |
| Number of M-Diagnoses                                                             | 1.05                        | 1.01, 1.08          | <b>0.013</b>     | 1.16                    | 1.12, 1.20          | <b>&lt;0.001</b> |
| Number of F-Diagnoses                                                             | 0.99                        | 0.97, 1.02          | 0.66             | 0.97                    | 0.95, 1.00          | <b>0.055</b>     |
| Sitting_time                                                                      |                             |                     |                  |                         |                     |                  |
| 01_less than half of the day                                                      | —                           | —                   |                  | —                       | —                   |                  |
| 02_half of the day                                                                | 0.93                        | 0.62, 1.39          | 0.71             | 0.71                    | 0.46, 1.10          | 0.12             |
| 03_at least 3/4 of the day                                                        | 0.93                        | 0.61, 1.41          | 0.72             | 0.85                    | 0.55, 1.32          | 0.47             |
| 04_almost all day                                                                 | 0.71                        | 0.42, 1.17          | 0.18             | 0.72                    | 0.43, 1.22          | 0.23             |
| Job Status                                                                        |                             |                     |                  |                         |                     |                  |
| 01_unemployed                                                                     | —                           | —                   |                  | —                       | —                   |                  |
| 02_self employed                                                                  | 0.80                        | 0.40, 1.62          | 0.54             | 0.69                    | 0.34, 1.42          | 0.31             |
| 03_regularly employed                                                             | 0.89                        | 0.46, 1.74          | 0.74             | 0.73                    | 0.37, 1.45          | 0.37             |
| wscore                                                                            | 0.94                        | 0.85, 1.04          | 0.21             | 0.92                    | 0.83, 1.02          | 0.10             |

<sup>1</sup>OR = Odds Ratio, CI = Confidence Interval

## Appendix 4.2 - Adjusted Modell - Pain Disability – During Covid Sensitivity

### Appendix 4.2 - Adjusted Modell - Pain Disability – During Covid-Sensitivity

| Characteristic               | 02 moderate pain disability |                     |         | 03 high pain disability |                     |         |
|------------------------------|-----------------------------|---------------------|---------|-------------------------|---------------------|---------|
|                              | OR <sup>1</sup>             | 95% CI <sup>1</sup> | p-value | OR <sup>1</sup>         | 95% CI <sup>1</sup> | p-value |
| Overall health               |                             |                     |         |                         |                     |         |
| 01_Very good                 | —                           | —                   |         | —                       | —                   |         |
| 02_good                      | 2.00                        | 1.43, 2.79          | <0.001  | 1.45                    | 0.88, 2.39          | 0.15    |
| 03_bad                       | 4.95                        | 2.97, 8.26          | <0.001  | 7.60                    | 4.07, 14.2          | <0.001  |
| PHQ-4                        | 1.33                        | 1.22, 1.44          | <0.001  | 1.67                    | 1.52, 1.84          | <0.001  |
| Activity days per week       |                             |                     |         |                         |                     |         |
| 00_never                     | —                           | —                   |         | —                       | —                   |         |
| 01_1day_per_wk               | 0.50                        | 0.25, 0.99          | 0.047   | 0.53                    | 0.22, 1.28          | 0.16    |
| 02_2days_per_wk              | 0.59                        | 0.30, 1.19          | 0.14    | 0.59                    | 0.24, 1.45          | 0.25    |
| 03_3days_per_wk              | 0.75                        | 0.36, 1.55          | 0.43    | 0.87                    | 0.34, 2.22          | 0.76    |
| 04_four or more              | 0.61                        | 0.29, 1.29          | 0.19    | 0.99                    | 0.38, 2.57          | 0.99    |
| Sport days per week          |                             |                     |         |                         |                     |         |
| 01_no sports                 | —                           | —                   |         | —                       | —                   |         |
| 02_less than two h per week  | 0.77                        | 0.45, 1.32          | 0.34    | 0.86                    | 0.44, 1.67          | 0.65    |
| 03_two to 4h per week        | 0.64                        | 0.36, 1.13          | 0.12    | 0.42                    | 0.20, 0.86          | 0.018   |
| 04_more than four h per week | 0.39                        | 0.20, 0.76          | 0.006   | 0.30                    | 0.13, 0.68          | 0.004   |
| Duration physical activity   |                             |                     |         |                         |                     |         |
| 01_less than ten minutes     | —                           | —                   |         | —                       | —                   |         |
| 02_10 to 30 minutes          | 1.12                        | 0.52, 2.37          | 0.78    | 1.14                    | 0.45, 2.86          | 0.78    |
| 03_30 to 60 minutes          | 1.44                        | 0.68, 3.04          | 0.34    | 1.05                    | 0.41, 2.63          | 0.92    |
| 04_more than 60 minutes      | 1.52                        | 0.71, 3.25          | 0.28    | 1.12                    | 0.43, 2.89          | 0.82    |
| Sex                          |                             |                     |         |                         |                     |         |
| M                            | —                           | —                   |         | —                       | —                   |         |
| W                            | 0.86                        | 0.64, 1.14          | 0.28    | 0.90                    | 0.61, 1.32          | 0.58    |
| Age                          | 1.00                        | 0.99, 1.02          | 0.81    | 1.02                    | 1.00, 1.04          | 0.14    |
| Number of M-Diagnoses        | 1.09                        | 1.04, 1.14          | <0.001  | 1.23                    | 1.17, 1.30          | <0.001  |
| Number of F-Diagnoses        | 0.95                        | 0.87, 1.04          | 0.26    | 0.98                    | 0.89, 1.07          | 0.60    |
| Sitting_time                 |                             |                     |         |                         |                     |         |
| 01_less than half of the day | —                           | —                   |         | —                       | —                   |         |
| 02_half of the day           | 1.09                        | 0.71, 1.65          | 0.70    | 0.75                    | 0.44, 1.30          | 0.31    |
| 03_at least 3/4 of the day   | 1.16                        | 0.77, 1.74          | 0.47    | 0.63                    | 0.37, 1.07          | 0.086   |
| 04_almost all day            | 0.99                        | 0.62, 1.58          | 0.96    | 0.74                    | 0.40, 1.35          | 0.32    |
| Job Status                   |                             |                     |         |                         |                     |         |
| 01_unemployed                | —                           | —                   |         | —                       | —                   |         |
| 02_self_employed             | 1.42                        | 0.74, 2.72          | 0.29    | 1.00                    | 0.44, 2.29          | >0.99   |
| 03_regularly_employed        | 1.08                        | 0.60, 1.92          | 0.81    | 0.79                    | 0.38, 1.66          | 0.54    |
| wscore                       | 1.04                        | 0.88, 1.22          | 0.66    | 0.99                    | 0.79, 1.23          | 0.91    |

<sup>1</sup>OR = Odds Ratio, CI = Confidence Interval

### Appendix 4.3 - Adjusted Modell - Pain Intensity – Pre Covid - Sensitivity

| <i>Appendix 4.3 - Adjusted Modell - Pain Intensity – Pre Covid - Sensitivity</i> |                 |                     |                  |
|----------------------------------------------------------------------------------|-----------------|---------------------|------------------|
| Characteristic                                                                   | OR <sup>1</sup> | 95% CI <sup>1</sup> | p-value          |
| <b>Overall health</b>                                                            |                 |                     |                  |
| 01_Very good                                                                     | —               | —                   |                  |
| 02_good                                                                          | 1.55            | 1.00, 2.43          | <b>0.052</b>     |
| 03_bad                                                                           | 4.46            | 2.78, 7.28          | <b>&lt;0.001</b> |
| <b>PHQ-4</b>                                                                     | 1.24            | 1.18, 1.32          | <b>&lt;0.001</b> |
| <b>Activity days per week</b>                                                    |                 |                     |                  |
| 00_never                                                                         | —               | —                   |                  |
| 01_1day_per_wk                                                                   | 0.74            | 0.44, 1.23          | 0.25             |
| 02_2days_per_wk                                                                  | 0.68            | 0.41, 1.13          | 0.13             |
| 03_3days_per_wk                                                                  | 0.74            | 0.43, 1.27          | 0.27             |
| 04_four or more                                                                  | 0.97            | 0.56, 1.67          | 0.92             |
| <b>Sport days per week</b>                                                       |                 |                     |                  |
| 01_no sports                                                                     | —               | —                   |                  |
| 02_less than two h per week                                                      | 0.86            | 0.60, 1.24          | 0.43             |
| 03_two to 4h per week                                                            | 1.07            | 0.74, 1.55          | 0.73             |
| 04_more than four h per week                                                     | 0.69            | 0.44, 1.07          | 0.10             |
| <b>Duration physical activity</b>                                                |                 |                     |                  |
| 01_less than ten minutes                                                         | —               | —                   |                  |
| 02_10 to 30 minutes                                                              | 1.18            | 0.68, 2.04          | 0.55             |
| 03_30 to 60 minutes                                                              | 1.07            | 0.62, 1.84          | 0.80             |
| 04_more than 60 minutes                                                          | 1.25            | 0.72, 2.16          | 0.42             |
| <b>Sex</b>                                                                       |                 |                     |                  |
| M                                                                                | —               | —                   |                  |
| W                                                                                | 1.03            | 0.79, 1.35          | 0.83             |
| <b>Age</b>                                                                       | 1.01            | 0.99, 1.02          | 0.36             |
| <b>Number of M-Diagnoses</b>                                                     | 1.06            | 1.04, 1.09          | <b>&lt;0.001</b> |
| <b>Number of F-Diagnoses</b>                                                     | 0.98            | 0.96, 1.00          | <b>0.030</b>     |
| <b>Sitting_time</b>                                                              |                 |                     |                  |
| 01_less than half of the day                                                     | —               | —                   |                  |
| 02_half of the day                                                               | 0.77            | 0.55, 1.07          | 0.12             |
| 03_at least 3/4 of the day                                                       | 1.00            | 0.71, 1.40          | 0.98             |
| 04_almost all day                                                                | 0.92            | 0.61, 1.38          | 0.68             |
| <b>Job Status</b>                                                                |                 |                     |                  |
| 01_unemployed                                                                    | —               | —                   |                  |
| 02_self_employed                                                                 | 1.51            | 0.87, 2.63          | 0.15             |
| 03_regularly_employed                                                            | 1.41            | 0.83, 2.40          | 0.20             |
| <b>wscore</b>                                                                    | 0.97            | 0.90, 1.05          | 0.50             |

<sup>1</sup>OR = Odds Ratio, CI = Confidence Interval

## Appendix 4.4 - Adjusted Modell - Pain Intensity – During Covid - Sensitivity

| <i>Appendix 4.4 - Adjusted Modell - Pain Intensity – During Covid - Sensitivity</i> |                 |                     |                  |
|-------------------------------------------------------------------------------------|-----------------|---------------------|------------------|
| Characteristic                                                                      | OR <sup>1</sup> | 95% CI <sup>1</sup> | p-value          |
| <b>Overall health</b>                                                               |                 |                     |                  |
| 01_ <i>Very good</i>                                                                | —               | —                   |                  |
| 02_ <i>good</i>                                                                     | 1.84            | 1.35, 2.53          | <b>&lt;0.001</b> |
| 03_ <i>bad</i>                                                                      | 4.52            | 2.93, 7.05          | <b>&lt;0.001</b> |
| <b>PHQ-4</b>                                                                        | 1.36            | 1.27, 1.46          | <b>&lt;0.001</b> |
| <b>Activity days per week</b>                                                       |                 |                     |                  |
| 00_ <i>never</i>                                                                    | —               | —                   |                  |
| 01_ <i>1day_per_wk</i>                                                              | 0.71            | 0.38, 1.34          | 0.29             |
| 02_ <i>2days_per_wk</i>                                                             | 0.47            | 0.25, 0.89          | <b>0.020</b>     |
| 03_ <i>3days_per_wk</i>                                                             | 0.68            | 0.35, 1.32          | 0.26             |
| 04_ <i>four or more</i>                                                             | 0.78            | 0.40, 1.54          | 0.48             |
| <b>Sport days per week</b>                                                          |                 |                     |                  |
| 01_ <i>no sports</i>                                                                | —               | —                   |                  |
| 02_ <i>less than two h per week</i>                                                 | 1.03            | 0.63, 1.67          | 0.90             |
| 03_ <i>two to 4h per week</i>                                                       | 0.93            | 0.55, 1.56          | 0.78             |
| 04_ <i>more than four h per week</i>                                                | 0.77            | 0.42, 1.40          | 0.39             |
| <b>Duration physical activity</b>                                                   |                 |                     |                  |
| 01_ <i>less than ten minutes</i>                                                    | —               | —                   |                  |
| 02_ <i>10 to 30 minutes</i>                                                         | 1.01            | 0.52, 1.99          | 0.97             |
| 03_ <i>30 to 60 minutes</i>                                                         | 1.02            | 0.52, 2.00          | 0.95             |
| 04_ <i>more than 60 minutes</i>                                                     | 1.27            | 0.64, 2.51          | 0.49             |
| <b>Sex</b>                                                                          |                 |                     |                  |
| M                                                                                   | —               | —                   |                  |
| W                                                                                   | 1.30            | 1.00, 1.69          | <b>0.049</b>     |
| <b>Age</b>                                                                          | 1.00            | 0.98, 1.01          | 0.60             |
| <b>Number of M-Diagnoses</b>                                                        | 1.07            | 1.03, 1.12          | <b>&lt;0.001</b> |
| <b>Number of F-Diagnoses</b>                                                        | 0.97            | 0.91, 1.04          | 0.39             |
| <b>Sitting time</b>                                                                 |                 |                     |                  |
| 01_ <i>less than half of the day</i>                                                | —               | —                   |                  |
| 02_ <i>half of the day</i>                                                          | 0.88            | 0.60, 1.28          | 0.50             |
| 03_ <i>at least 3/4 of the day</i>                                                  | 0.99            | 0.69, 1.43          | 0.95             |
| 04_ <i>almost all day</i>                                                           | 0.91            | 0.59, 1.39          | 0.66             |
| <b>Job Status</b>                                                                   |                 |                     |                  |
| 01_ <i>unemployed</i>                                                               | —               | —                   |                  |
| 02_ <i>self_employed</i>                                                            | 1.14            | 0.63, 2.05          | 0.67             |
| 03_ <i>regularly_employed</i>                                                       | 1.18            | 0.70, 2.01          | 0.53             |
| <b>wscore</b>                                                                       | 1.02            | 0.88, 1.19          | 0.77             |

<sup>1</sup>OR = Odds Ratio, CI = Confidence Interval
